# Supplementary material for: Appraisals of Interparental Conflict and Change in Attention to Emotion after Exposure to Marital Conflict
Source: Springer Nature journal article supplement (doi:10.1007/s10826-017-0721-9), 2017-04-19
Supplement: MOESM1 [file 12232102]

**Supplementary Material**

In the current study, appraisals of interparental conflict were measured after watching the neutral or conflict recording. In a supplementary study, we examined the potential that appraisals may systemically differ based on exposure to marital conflict.

**Participants**

Emerging adults (*n* = 94) from the United States whose parents were still married were recruited through Amazon Mechanical Turk (MTurk) and were paid for their participation. Participants ranged in age from 19 to 25 years of age (*M* = 22.70, *SD* = 1.80), were evenly split in terms of sex (50% female), and represented a variety of racial/ethnic backgrounds (67% Caucasian, 12% Asian American, 10% Latino/Latina, 7% Black, 5% other or multiple racial/ethnic backgrounds). On average, participants reported having completed some college, and that they came from families with yearly income that was approximately $50,000-64,000. In addition, on average, participants’ parents had been married for 27.61 years (*SD* = 6.42).

**Procedure**

Amazon MTurk employees were invited to participate in a brief study of ‘relationships and disagreements’. Stated inclusion criteria were that participants be between the ages of 18 and 25 years whose parents are married. Participants were randomly assigned to two conditions: a) reporting appraisals of interparental conflict before exposure to marital conflict (*n* = 50), and b) reporting appraisals after marital conflict exposure (*n* = 44). Presented was a recording of a conflict episode between a man and woman who identified themselves as married; this recording lasted approximately 14 minutes, and displayed escalating, intense, unresolved, and child-centered conflict. Immediately after the recording, participants were asked six factual questions about the content of the recording (e.g., what did the man take out of the fridge?). At the end of the survey, participants reported demographic information. Participants were included in the current study if they answered three or more of the factual questions correctly (across conditions, 16 individuals were excluded because they did not answer enough questions correctly, suggesting a lack of attention to the conflict episode). The final sample of 94 reflects those who met both inclusion criteria and answered three attention-check questions correctly.

**Measures**

Participants reported their appraisals of interparental conflict using the 49-item Children’s Perceptions of Interparental Conflict Scale (CPIC) (Grych et al., 1992) that has been used from childhood through emerging adulthood (Bickham & Fiese, 1997; Grych et al., 1992; Lucas-Thompson & Hostinar, 2013). The CPIC assesses marital conflict frequency, intensity, resolution, threat, coping efficacy of the child, content (child or non-child related), stability, self-blame, and triangulation (or the likelihood of the conflict involving the child). Answer choices are “true,” “sort of true,” and “false”; after reverse scoring, higher scores reflect more-negative appraisals. *Conflict properties* appraisals reflect perceptions of conflict frequency, hostility, resolution, causes and triangulation (whether the child is put in the middle) (28 items; Cronbach’s α = .95; *M* = 1.79, *SD* = .54). *Threat* appraisals reflect feelings about the extent to which interparental conflict is deemed threatening and beyond the child’s coping abilities (12 items; Cronbach’s α = .85; *M* = 1.68, *SD* = .47). *Self-blame* appraisals reflect perceptions that conflict is often about the child and the fault of the child (9 items; Cronbach’s α = .79; *M* = 1.38, *SD* = .40).

Participants also reported their age, parents’ marital status (to confirm that inclusion criteria were met), length of parents’ marriage, level of education, family income, and race/ethnicity.

**Results**

To examine the equivalence of groups, a series of chi-square and independent samples *t*-test analyses were conducted. There were no differences between conditions in terms of sex, ethnicity (χ2s<7.89, *p*s>.16), length of parents’ marriage, education, or income (*t*s<.19, *p*s > .86).

To determine if there were systematic differences in appraisals of interparental conflict after brief exposure to marital conflict, independent samples *t*-tests were conducted with each conflict appraisal dimension. There were no significant differences in conflict appraisals based on whether they were provided before or after exposure to an episode of interparental conflict (see Table 1). Effect sizes for the differences ranged from relatively trivial to small.

Supplementary Table.

*Differences in Conflict Appraisals based on Conflict Exposure*

|  | Appraisals Before Conflict Exposure | Appraisals After Conflict Exposure | Difference between conditions |
| --- | --- | --- | --- |
|  | *M*(*SD*) | *M*(*SD*) |  |
| Conflict properties | 1.81(.52) | 1.77(.57) | *t*(91)=.33, *p* = .74, *d* = .07 |
| Threat | 1.62(.48) | 1.74(.46) | *t*(91)=.43, *p* = .43, *d* = .25 |
| Self-blame | 1.34(.40) | 1.41(.41) | *t*(91)=-1.20, *p* = .24, *d* = .17 |
